# Supplementary material for: Characterization of a Prefusion-Specific Antibody That Recognizes a Quaternary, Cleavage-Dependent Epitope on the RSV Fusion Glycoprotein
Source: PubMed Central journal article supplement (PMC4498696; doi:10.1371/journal.ppat.1005035), 2015-07-10
Supplement: ppat.1005035.s010.pdf [file ppat.1005035.s010.pdf]

**S1 Table. Crystals and resulting diffraction for AM14 bound prefusion F complexes.**

| Protein Complex                  | Crystal Morphology | Diffraction       |
|----------------------------------|--------------------|-------------------|
| DS-Cav1 (A2) + AM14              | Needles            | -                 |
| DS-Cav1 (9320) + AM14            | Rectangular Plates | 5.0 Å Anisotropic |
| DS-Cav1 (A2) + AM14 + D25        | Arrowheads         | 6.5 Å             |
| DS-Cav1 (9320) + AM14 + D25      | Footballs          | 6.5 Å             |
| DS-Cav1 (A2) + AM14 + Mota       | Rods               | 5.5 Å             |
| DS-Cav1 (A2) + AM14 + Mota + D25 | Blocks             | 17 Å              |
| DS-Cav1 (A2) + AM14 dsFv         | Small Diamonds     | None              |
| F (A2) without Foldon + AM14     | Hexagonal Plates   | 9 Å               |
