# Supplementary material for: Characterization of a Prefusion-Specific Antibody That Recognizes a Quaternary, Cleavage-Dependent Epitope on the RSV Fusion Glycoprotein
Source: PubMed Central journal article supplement (PMC4498696; doi:10.1371/journal.ppat.1005035), 2015-07-10
Supplement: ppat.1005035.s011.pdf [file ppat.1005035.s011.pdf]

**S2 Table. Crystallographic data collection and refinement statistics.**

|                                                         | AM14 Fab                                        | DS-Cav1 + AM14 Fab<br>+ Motavizumab Fab |
|---------------------------------------------------------|-------------------------------------------------|-----------------------------------------|
| <b>PDB ID</b>                                           | 4ZYK                                            | 4ZYP                                    |
| <b>Data collection</b>                                  |                                                 |                                         |
| Space group                                             | <i>P2<sub>1</sub>2<sub>1</sub>2<sub>1</sub></i> | <i>P2<sub>1</sub></i>                   |
| Cell constants                                          |                                                 |                                         |
| <i>a</i> , <i>b</i> , <i>c</i> (Å)                      | 69.7, 95.9, 146.0                               | 114.4, 210.3, 118.2                     |
| $\alpha$ , $\beta$ , $\gamma$ (°)                       | 90, 90, 90                                      | 90, 100.5, 90                           |
| Wavelength (Å)                                          | 0.9770                                          | 0.9792                                  |
| Resolution (Å)                                          | 52.6-2.0 (2.05-2.00)                            | 49.6-5.5 (6.15-5.50)                    |
| <i>R</i> <sub>merge</sub>                               | 0.179 (1.190)                                   | 0.182 (0.789)                           |
| <i>R</i> <sub>pim</sub>                                 | 0.087 (0.615)                                   | 0.125 (0.544)                           |
| <i>I</i> / $\sigma$ <i>I</i>                            | 6.9 (2.2)                                       | 4.8 (1.5)                               |
| CC(1/2)                                                 | 0.990 (0.542)                                   | 0.939 (0.553)                           |
| Completeness (%)                                        | 100.0 (99.9)                                    | 97.5 (97.6)                             |
| Redundancy                                              | 5.0 (4.7)                                       | 3.0 (2.9)                               |
| <b>Refinement</b>                                       |                                                 |                                         |
| Resolution (Å)                                          | 52.6-2.0 (2.03-2.00)                            | 49.4-5.5 (5.84-5.50)                    |
| No. reflections                                         | 66,725 (2,686)                                  | 17,391 (2,886)                          |
| <i>R</i> <sub>work</sub> / <i>R</i> <sub>free</sub> (%) | 18.6/22.6                                       | 21.1/27.7                               |
| No. atoms                                               |                                                 |                                         |
| Protein                                                 | 6549                                            | 29981                                   |
| Ligand/ion                                              | 34                                              | 0                                       |
| Water                                                   | 623                                             | 0                                       |
| <i>B</i> -factors                                       |                                                 |                                         |
| Protein                                                 | 31.8                                            | 217.5                                   |
| Ligand/ion                                              | 51.1                                            | -                                       |
| Water                                                   | 39.7                                            | -                                       |
| R.m.s. deviations                                       |                                                 |                                         |
| Bond lengths (Å)                                        | 0.003                                           | 0.006                                   |
| Bond angles (°)                                         | 0.76                                            | 1.35                                    |
| Ramachandran                                            |                                                 |                                         |
| Favored (%)                                             | 97.4                                            | 94.2                                    |
| Allowed (%)                                             | 2.6                                             | 5.3                                     |
| Outliers (%)                                            | 0.0                                             | 0.6                                     |
